# Supplementary material for: Do Biology Majors Really Differ from Non–STEM Majors?
Source: PubMed Central journal article supplement — CBE Life Sci Educ. 2017 Fall;16(3):ar48. doi: 10.1187/cbe.16-11-0329 (PMC5589428; doi:10.1187/cbe.16-11-0329), 2017
Supplement: supp_16.3.ar48_CombinedSupMats.pdf [file supp_16.3.ar48_CombinedSupMats.pdf]

# Supplemental Material

*CBE—Life Sciences Education*

Cotner *et al.*

**Appendix 1. Survey items, sources, and results of Standard Least-Squares multiple regression.**

Significant predictors are noted by shading and asterisks; \*p<0.05; \*\*p<0.01; \*\*\*p<0.001.

| <b>Are there differences in how students see themselves?</b><br>(Likert-scale responses ranging from 1=not at all like me to 5=very much like me) | majors<br>vs non | Gender | Ethnicity | ACT |
|---------------------------------------------------------------------------------------------------------------------------------------------------|------------------|--------|-----------|-----|
| A Science Person <sup>a</sup>                                                                                                                     | ***              | ***    |           | *** |
| A Creative Person <sup>a</sup>                                                                                                                    |                  |        |           |     |
| An Artistic Person <sup>a</sup>                                                                                                                   | ***              | ***    |           |     |
| An Athletic Person <sup>a</sup>                                                                                                                   |                  | ***    | ***       |     |
| A People Person <sup>a</sup>                                                                                                                      |                  |        |           |     |
| A Spiritual Person <sup>a</sup>                                                                                                                   |                  |        | **        | *** |

| <b>Are there confidence differences?</b><br>(Likert-scale responses ranging from 1=not confident to 4=very confident)                                    | majors<br>vs non | Gender | Ethnicity | ACT |
|----------------------------------------------------------------------------------------------------------------------------------------------------------|------------------|--------|-----------|-----|
| Understand and evaluate scientific literature (i.e. papers written by scientists published in scientific journals). <sup>b</sup>                         | ***              | ***    |           | *** |
| Analyze a set of observations, tables, or graphs to identify possible patterns. <sup>b</sup>                                                             | ***              | ***    |           | *** |
| Pose questions about observations that can be answered with an experiment. <sup>b</sup>                                                                  | **               | ***    |           | *** |
| Develop a hypothesis related to a question that has been posed. <sup>b</sup>                                                                             | **               |        |           | *** |
| Design a well-controlled experiment to test a hypothesis. <sup>b</sup>                                                                                   |                  | ***    |           | *** |
| Make predictions about the results I could expect to get from an experiment. <sup>b</sup>                                                                |                  | ***    | *         | **  |
| Collect, organize and display the results of an experiment. <sup>b</sup>                                                                                 | **               |        |           | *** |
| Use statistics or other appropriate methods to analyze the results of an experiment. <sup>b</sup>                                                        | ***              | ***    |           | *** |
| Draw conclusions about a hypothesis based the results of the experiment. (taking into account possible sources of error in the experiment). <sup>b</sup> | ***              | **     |           | *** |
| Explain an experiment, the results, and analysis orally. <sup>b</sup>                                                                                    | **               | **     |           | *** |
| Explain an experiment, the results, and analysis in writing. <sup>b</sup>                                                                                | ***              |        |           | *** |

| <b>Are there confidence differences?</b><br>(Likert-scale responses ranging from 1=strongly disagree to 5=strongly agree) | majors vs non | Gender | Ethnicity | ACT |
|---------------------------------------------------------------------------------------------------------------------------|---------------|--------|-----------|-----|
| Even if I forget the facts, I'll still be able to use scientific thinking to solve problems. <sup>c</sup>                 | ***           | **     |           | *** |
| I can do well in science courses. <sup>c</sup>                                                                            | ***           | ***    | **        | *** |
| I can understand and evaluate the science related to a current issue, such as climate change. <sup>c</sup>                | ***           | ***    |           | *** |
| I can use my understanding of science to judge the quality of scientific studies. <sup>d</sup>                            | ***           | *      |           | *** |
| I could never be a successful scientist. <sup>a</sup>                                                                     | ***           | ***    | *         | *** |

| <b>Differences in perceptions of science and scientists?</b><br>(Likert-scale responses ranging from 1=strongly disagree to 5=strongly agree) | majors vs non | Gender | Ethnicity | ACT |
|-----------------------------------------------------------------------------------------------------------------------------------------------|---------------|--------|-----------|-----|
| You can rely on scientific results to be true and correct. <sup>c</sup>                                                                       |               | **     |           |     |
| When scientific results conflict with my personal experience, I follow my personal experience in making choices. <sup>c</sup>                 | **            |        |           | *** |
| A science course is a valuable part of a complete undergraduate education, regardless of major. <sup>c</sup>                                  | ***           |        |           | *** |
| I wish science instructors would just tell us what we need to know so we can learn it. <sup>c</sup>                                           | *             |        |           | *** |
| Creativity does not play a role in science. <sup>c</sup>                                                                                      | **            |        |           | *** |
| Science is not connected to non-science fields such as history, literature, economics, or art. <sup>c</sup>                                   |               | ***    |           | *** |
| When experts disagree on a science question, it's because they don't know all the facts yet. <sup>c</sup>                                     | *             | *      |           |     |
| I get personal satisfaction when I solve a scientific problem by figuring it out myself. <sup>c</sup>                                         | ***           |        |           | *** |
| Since nothing in science is known for certain, all scientific conclusions are equally valid. <sup>c</sup>                                     | ***           |        | ***       | *** |
| Science is mostly an accumulation of facts, rules, and formulas. <sup>c</sup>                                                                 | ***           |        |           | *** |
| Scientists don't follow the scientific method in a straight line. <sup>c</sup>                                                                | ***           |        |           | *** |
| There is too much emphasis in science courses on figuring things out for yourself. <sup>c</sup>                                               |               |        | *         | *** |

|                                                                                                                                           |               |        |           |     |
|-------------------------------------------------------------------------------------------------------------------------------------------|---------------|--------|-----------|-----|
| Scientists know what the results of their experiments will be before they start. <sup>c</sup>                                             | *             | *      |           | *   |
| Explaining science ideas to others has helped me understand the ideas better. <sup>c</sup>                                                | ***           |        |           | *** |
| The main job of instructors in science courses is to structure the work so that we can learn it ourselves. <sup>d</sup>                   |               | **     |           |     |
| Scientists play with statistics to support their own ideas. <sup>d</sup>                                                                  |               | **     |           | *** |
| Course labs are used to confirm information studied in that science course. <sup>d</sup>                                                  | ***           |        |           |     |
| If an experiment shows that something doesn't work, the experiment was a failure. <sup>d</sup>                                            | ***           |        |           | *** |
| When making an important personal decision, I use scientific processes, such as evaluating the available evidence. <sup>d</sup>           |               |        |           | *** |
| Science is a process of gathering and interpreting evidence (for example, making observations to explain the natural world). <sup>d</sup> | ***           |        |           | *** |
| Science can be used in a person's daily life. <sup>d</sup>                                                                                | ***           |        |           | *** |
| I use science in my daily life. <sup>d</sup>                                                                                              |               |        |           | *** |
| I think that science often has more negative impacts on society than positive impacts. <sup>d</sup>                                       | **            |        |           | *** |
| I think that science is extremely valuable for society. <sup>d</sup>                                                                      | ***           |        |           | *** |
| Solving scientific problems is interesting. <sup>a</sup>                                                                                  | ***           |        |           | *** |
| Scientific topics do not interest me. <sup>a</sup>                                                                                        | ***           |        |           | *** |
| I am interested in the way science can be used to help people. <sup>a</sup>                                                               | ***           | *      |           | **  |
| I am interested in the way science can be used to solve problems. <sup>a</sup>                                                            | ***           |        |           | *** |
| I am not interested in using science to help others. <sup>a</sup>                                                                         | ***           | *      |           | *** |
|                                                                                                                                           | majors vs non | Gender | Ethnicity | ACT |

Sources: a. Cole, S. (2012). Loyola eCommons The Development of Science Identity : An Evaluation of Youth Development Programs at the Museum of Science and Industry , Chicago; b. Seymour, E., Hunter, A. B., Laursen, S. L., & Deantoni, T. (2004). Establishing the benefits of research experiences for undergraduates in the sciences: First findings from a three-year study. *Science Education*, 88(4), 493–534. <http://doi.org/10.1002/sce.10131>; c. Lopatto, D. (2004). Survey of Undergraduate Research Experiences (SURE): first findings. *Cell Biology Education*, 3(4), 270–277. <http://doi.org/10.1187/cbe.04-07-0045>; d. generated in-house.
